# Supplementary material
Source: publisher figshare collection journal article supplement (https://acs.figshare.com/ndownloader/files/12794684)
Supplement: Supplementary file 1 [file 12794684]

## Supporting Information

Amrita Basu<sup>a</sup>, Aneta Dydowiczová<sup>a</sup>, Lucie Čtveráčková<sup>a</sup>, Libor Jaša<sup>a</sup>, James E. Trosko<sup>b</sup>, Luděk Bláha<sup>a</sup>, Pavel Babica<sup>a\*</sup>

### **Assessment of Hepatotoxic Potential of Cyanobacterial Toxins Using 3D In Vitro Model of Adult Human Liver Stem Cells**

<sup>a</sup> RECETOX, Faculty of Science, Masaryk University, Masaryk University, Kamenice 753/5, Brno 625 00, Czech Republic

<sup>b</sup> Department of Pediatrics and Human Development & Institute for Integrative Toxicology, Michigan State University, 1129 Farm Lane, East Lansing, 48824 Michigan, United States

\*Corresponding author:

Pavel Babica  
RECETOX  
Faculty of Science  
Masaryk University  
Kamenice 753/5, building A29  
625 00  
Brno  
Czech Republic  
Email: babica@recetox.muni.cz  
Tel: (+420) 549 494 620  
Fax: (+420) 549 49 2840  
ORCID: P.B. 0000-0001-6399-3554

## Supporting Information

### Methods

#### Cell culture

HL1-hT1 cells were routinely cultured in Keratinocyte-SFM medium with 5 ng/mL recombinant human epidermal growth factor and 50 µg/mL bovine pituitary extract (Gibco by ThermoFisher, Waltham, MA), and further supplemented with 2 mM of N-Acetyl-L-cysteine, 5 mM of nicotinamide, 0.2 mM of ascorbic acid (all Sigma-Aldrich, St. Louis, MO) and 10 % fetal bovine serum (Biochrom, Cat. No. S0615, Berlin, Germany). All incubations and exposures of HL1-hT1 cells were carried out at 37 °C in a cell culture incubator at 95% relative humidity with a 5% CO<sub>2</sub> supply. Cells were routinely cultured in T25 flasks (TPP, Trasadingen, Switzerland) to ~80% confluence and passaged in 1:10 ratio using Trypsin/EDTA (Gibco) once per week.

Scaffold-free spheroid cultures were prepared in agarose hydrogels, using sterile 3D Petri Dish® micromolds (type 24-35, Sigma-Aldrich). 330 µL of 2% (w/v) sterile molten (60°C) agarose (Sigma-Aldrich, Cat. No. A9539) dissolved in a 0.9 % (w/v) sodium chloride was pipetted into a micromold for casting gels fitting 24-well microplates. Solidified micromolded gels were transferred into the wells of 24-well microplate (TPP), and then immobilized with 120 µL of molten agarose (39°C) pipetted into each well outside the gel. Immobilized gels were then equilibrated twice for 15 min with 1 mL of complete culture media. Cell suspension (75 µL) was seeded subsequently in the inner chamber of the gel containing 35 microwells (800 µm diameter x 800 µm depth). The cells were allowed to settle into the microwells for 10 min, then 1 mL of cell culture or exposure media was added to each well. In all spheroid experiments, cell culture or exposure medium (1 mL) was exchanged after 96 h, 168 h and 264 h of culture.

#### Cell viability

**Monolayer:** HL1-hT1 cells were seeded 48 h prior the exposure at the density  $18 \times 10^3$  cell/cm<sup>2</sup> into 96-well plates (100 µL per well), which corresponded to  $3.6 \times 10^3$  cell/well for the impedimetric experiments conducted in E-plates (ACEA Biosciences, San Diego, CA) with 0.2 cm<sup>2</sup> well bottoms, and to  $6 \times 10^3$  cell/well for viability assays conducted in traditional tissue-culture treated polystyrene microplates (Greiner Bio One, Kremsmunster, Austria) with 0.34 cm<sup>2</sup> well bottom area.

Cell viability was also evaluated, using a combination of three metabolic assays, evaluating cell respiration and dehydrogenase activity (Alamar Blue, AB), esterase activity and membrane integrity (5-Carboxyfluorescein Diacetate-Acetoxyethyl Ester, CFDA-AM), and uptake and accumulation of Neutral Red (NR) dye<sup>1</sup>. The assays were conducted with the cells seeded into polystyrene 96-well black plates (Greiner Bio One, Kremsmunster, Austria). Following 48 h or 96 h exposure, the cells were washed with phosphate-buffered saline (PBS) and incubated with a serum-free medium containing 4% (v/v) AB and 4 µM CFDA-AM (both ThermoFisher). After 30 min of incubation, the fluorescence of AB (excitation/emission: 530/590 nm) and CFDA-AM (excitation/emission: 485/520 nm) was measured by a microplate reader Synergy 4 Reader (BioTek, Winooski,

VT). The cells were then rinsed again with PBS and incubated for 2 h with NR (0.005%, w/v) dissolved in a serum-free medium. After the incubation, the cells were rinsed again with PBS and NR was extracted by 1% (v/v) acetic acid in 50% (v/v) ethanol. NR absorbance was measured at 540 nm wavelength (690 nm reference) by the microplate reader. Absorbance/fluorescence from the blank wells incubated with AB/CFDA-AM/NR, but without the cells, were subtracted from the readouts of the experimental wells. Blank-subtracted values were compared with the nontreated control and expressed as a % of control. All experimental conditions were prepared in triplicates and the experiments were repeated at least three times independently.

**Spheroid cultures:** The exposure medium (1 mL) was aspirated from the outside of the agarose gel, which was rinsed twice for 15 min with 1 mL of serum-free culture medium. Spheroids were then incubated for 4 h with 1 mL of AB (4%, v/v, in serum-free culture medium). Microplates were then gently shaken on the orbital shaker (10 min), and AB solution from each experimental well was pipetted in triplicate (3x250  $\mu$ L) into the 96-well plate (Greiner). Fluorescence of AB was measured as described above. Wells with the agarose gel, but without the spheroids, were used as a blank, and the blank-subtracted readouts from the experimental treatments were then compared with the nontreated control and expressed as a % of control. Each treatment (gel with 35 spheroids) was repeated at least in three independent experiments.

#### **LC-MS/MS analysis of microcystin-LR (MC-LR) and cylindrospermopsin (CYN)**

Total concentrations of MC-LR and CYN in the exposure medium during the *in vitro* experiments were determined by LC-MS/MS. Exposure medium was collected from the wells with the monolayer cultures (t=24, 48, 72 and 96 h of exposure) or spheroid cultures (t=96, 168, 264 and 336 h of exposure, when the medium was exchanged/removed, and also 1 h after addition of fresh exposure media, i.e. t=1, 97, 169 and 265 h). As a control, cyanotoxins were analysed also in the parallel blank wells containing exposure medium without the cells. Culture medium was aspirated after a given exposure period into microcentrifuge tubes, preserved by addition of an equal volume of 100% MeOH and stored at  $-20^{\circ}\text{C}$ . Before analysis, the samples were clarified by centrifugation (20,000 $\times$ G, 15 min) and filtered via 0.45  $\mu$ m Nylon syringe filter (Labicom, Olomouc, Czech Republic).

Concentration of MC-LR was determined by Waters Acquity UPLC using Waters Acquity UPLC BEH C18 column (2.1 x 50 mm, 1.7  $\mu$ m) with a 2.1 x 5 mm pre-column (Waters, Dublin, Ireland). Mobile phase consisted of 0.1% formic acid (A) and 0.1% formic acid- acetonitrile (B). Gradient elution started with 20%B at 0 min and ramped to 60% at 5 min and to 90% at 5.5 min (flow rate 0.4 mL/min, temperature  $30^{\circ}\text{C}$ , injection volume 5  $\mu$ L). After 8 min, the column was equilibrated for 2.5 min with 20%B. Waters Xevo TQS was used in the positive mode of electrospray ionization (ESI): capillary voltage 3500 V, drying gas temperature  $350^{\circ}\text{C}$ , flow rate 800 L/h, pressure 7 bar, collision energy 60 V. Multiple reaction monitoring (MRM) was used to detect MC-LR transitions at  $m/z$  996.5 > 135 and 213.1. External calibrations were used, with the instrumental limit of detection being 0.5 ng/mL (0.5 nM) and limit of quantification being 1 ng/mL (1 nM).

Concentration of CYN was analyzed by Agilent 1260 Infinity using Poroshell 120 EC-18 column (2.1 x 100 mm, 2.7  $\mu$ m) with a 2.1 x 5 mm pre-column (Agilent Technologies, Waldbronn, Germany). Mobile phase consisted of

0.1% formic acid-1% acetonitrile (A) and 0.1% formic acid-acetonitrile (B). Elution started with of 0%B between 0-2.5 min which ramped to 50% at 2.6 min and was maintained for 1.4 min (flow rate 0.4 mL/min, temperature 35°C, injection volume 5 µL). The column was equilibrated for 6 min with 100%A. Agilent 6460 triple quadrupole was used in the positive mode of ESI: capillary voltage 4000 V, drying gas temperature 300°C, flow rate 300 L/h, nebulizing gas pressure 3 bar, jet voltage 500 V, collision energy 4 V. MRM was used to detect CYN transitions at  $m/z$  416 > 194 and 179. External calibration was used, with the instrumental limit of detection being 0.15 ng/mL (0.4 nM) and limit of quantification being 0.4 ng/mL (1 nM).

## References

- (1) Boaru, D. A.; Dragoş, N.; Schirmer, K.; Dragos, N.; Schirmer, K. Microcystin-LR Induced Cellular Effects in Mammalian and Fish Primary Hepatocyte Cultures and Cell Lines: A Comparative Study. *Toxicology* **2006**, 218 (2–3), 134–148.

A)

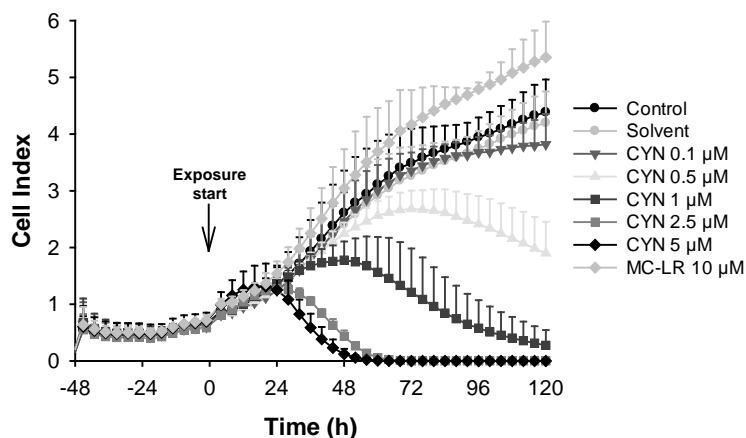

B)

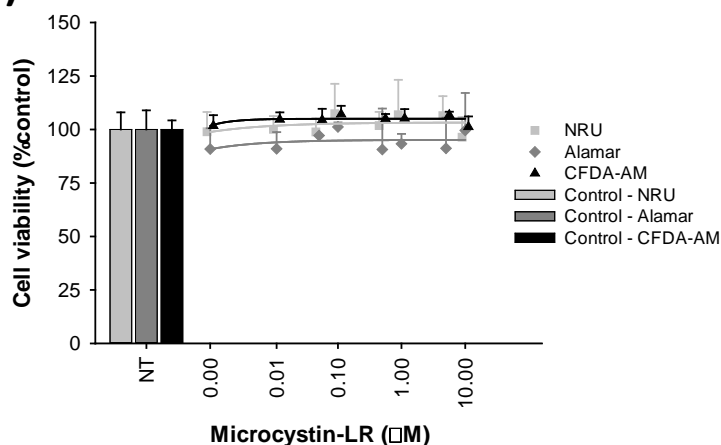

C)

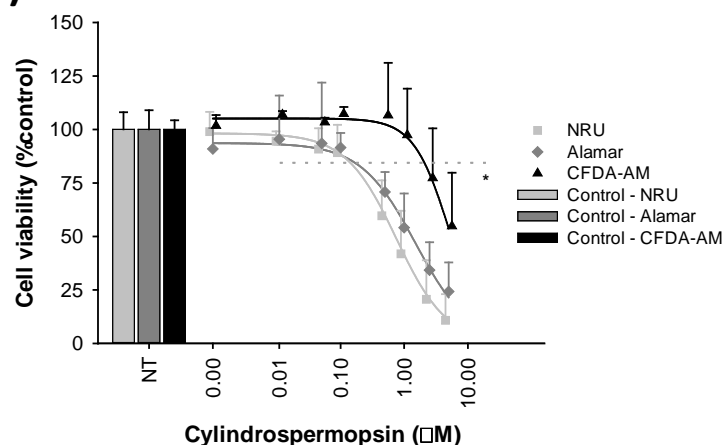

D)

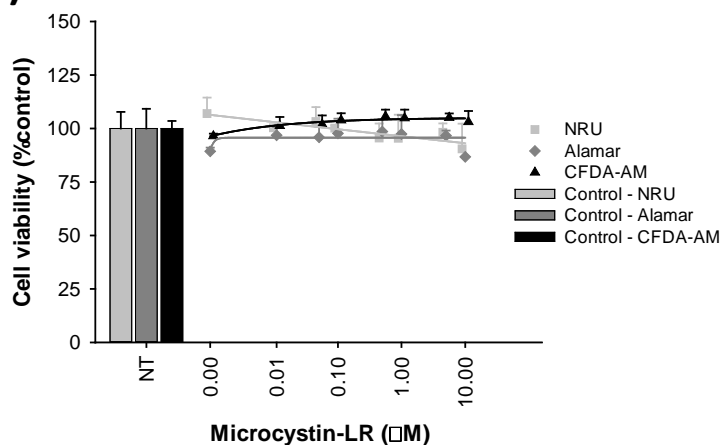

E)

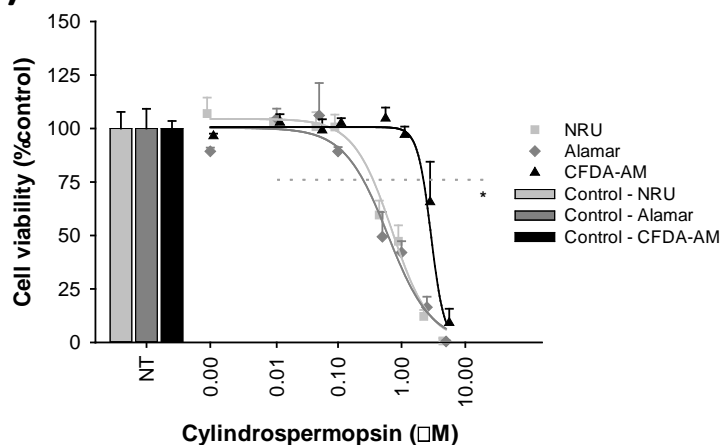

**Supporting Figure S1. Effects of microcystin-LR (MC-LR) cylindrospermopsin (CYN) on the growth and viability of adult human liver stem cells in monolayer experiments.** HL1-hT1 cells were treated 48 h post-seeding by cyanotoxin MC-LR or CYN. (A) Cell growth and condition was monitored for 120 h of exposure by real-time impedimetric analysis with impedance values reported as Cell Index. (B-E) Cell viability was evaluated by Neutral Red Uptake (NRU), Alamar Blue and CFDA-AM assays conducted after 48 h (B, C) or 96 h (D, E) of exposure. NT - nontreated control (Control), Solvent – solvent control (0.2% MeOH, v/v). Data represent average $\pm$ SD values from independently repeated experiments, the curves in the graphs B-E represent a fit of 3-parameter sigmoid function. \*Data points below the dashed line were significantly lower (Mann-Whitney test,  $p < 0.05$ ) than the solvent control.

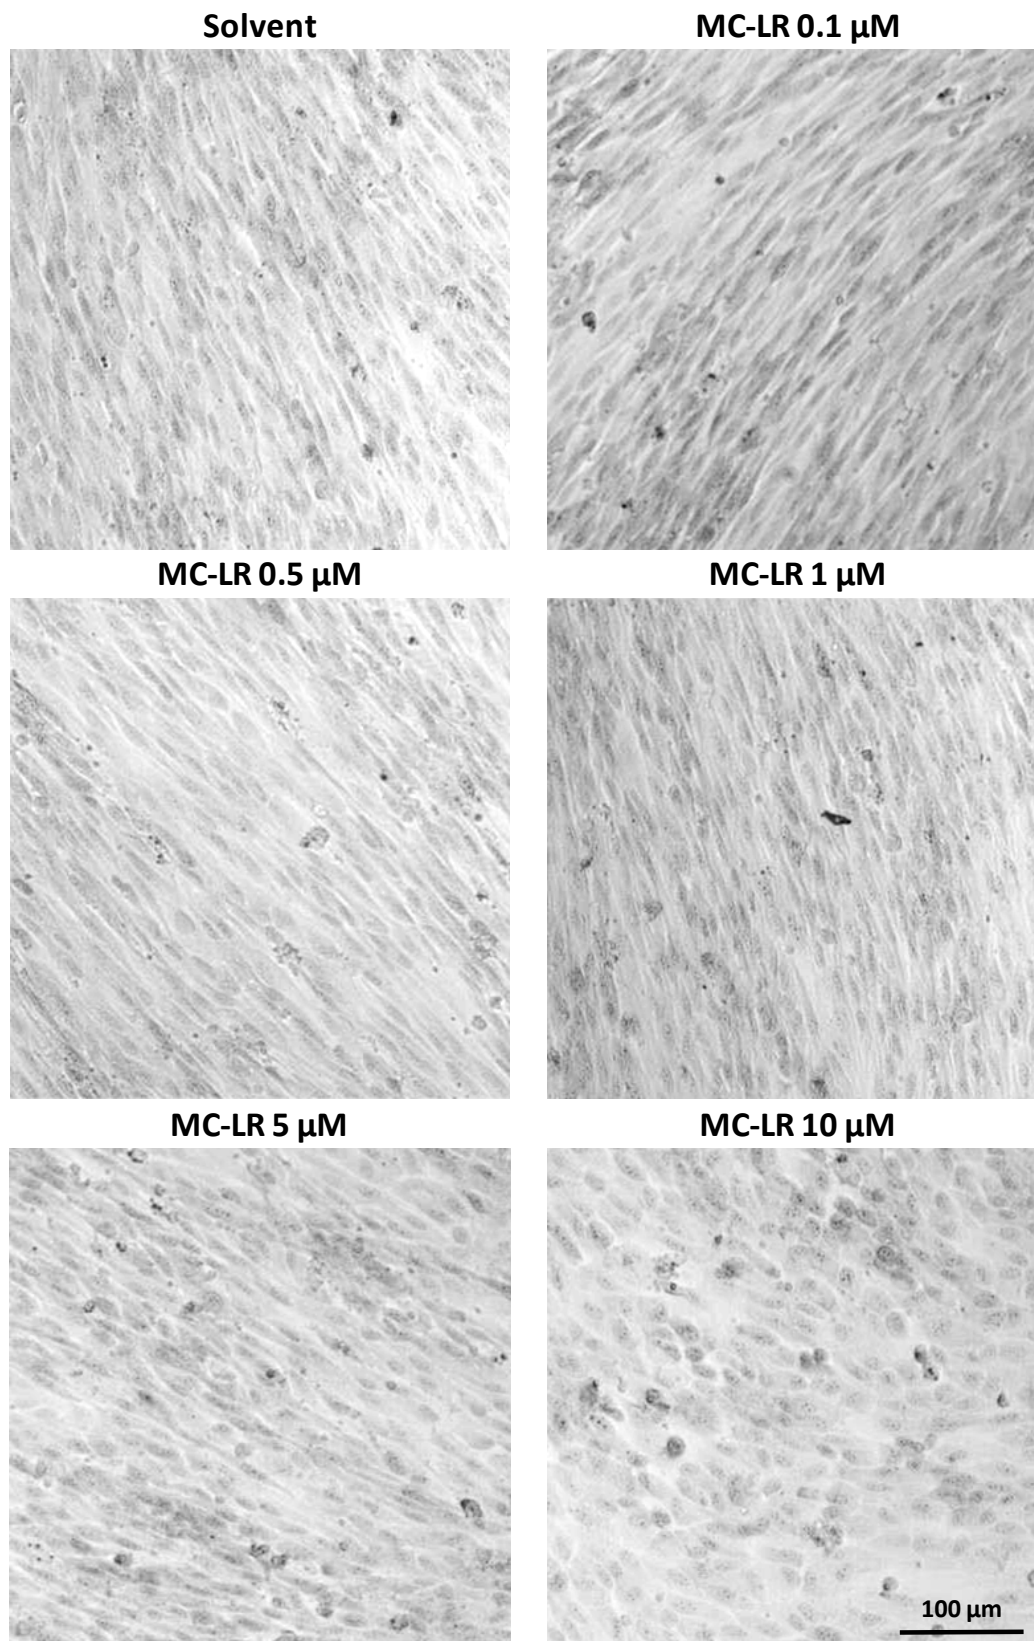

**Supporting Figure S2. Effects of microcystin-LR (MC-LR) on adult human liver stem cells in the monolayer experiment.** HL1-hT1 cells in a 96-well plate were treated 48 h post-seeding with MC-LR. Brightfield microphotographs were acquired after 96 h exposure using a 10X objective. Solvent – solvent control (0.2% MeOH, v/v).

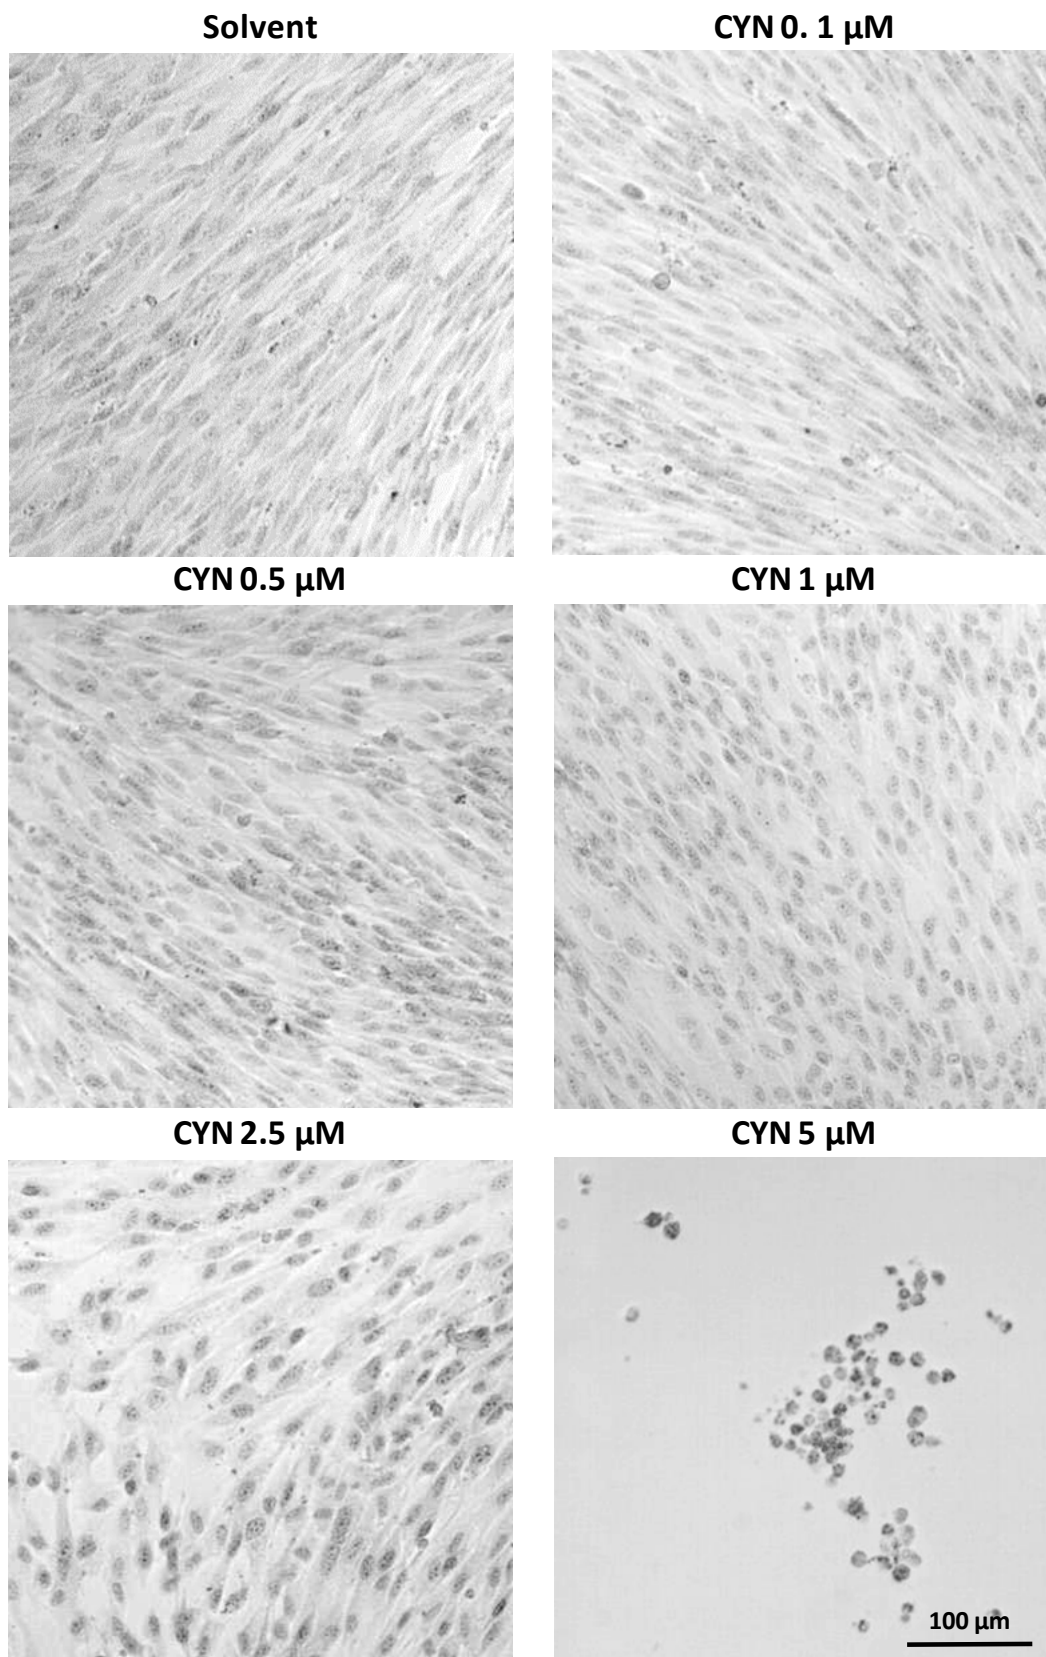

**Supporting Figure S3. Effects of cylindrospermopsin (CYN) on adult human liver stem cells in the monolayer experiment.** HL1-hT1 cells in a 96-well plate were treated 48 h post-seeding with CYN. Brightfield microphotographs were acquired after 96 h exposure using a 10X objective. Solvent - solvent control (0.2% MeOH, v/v).

A)

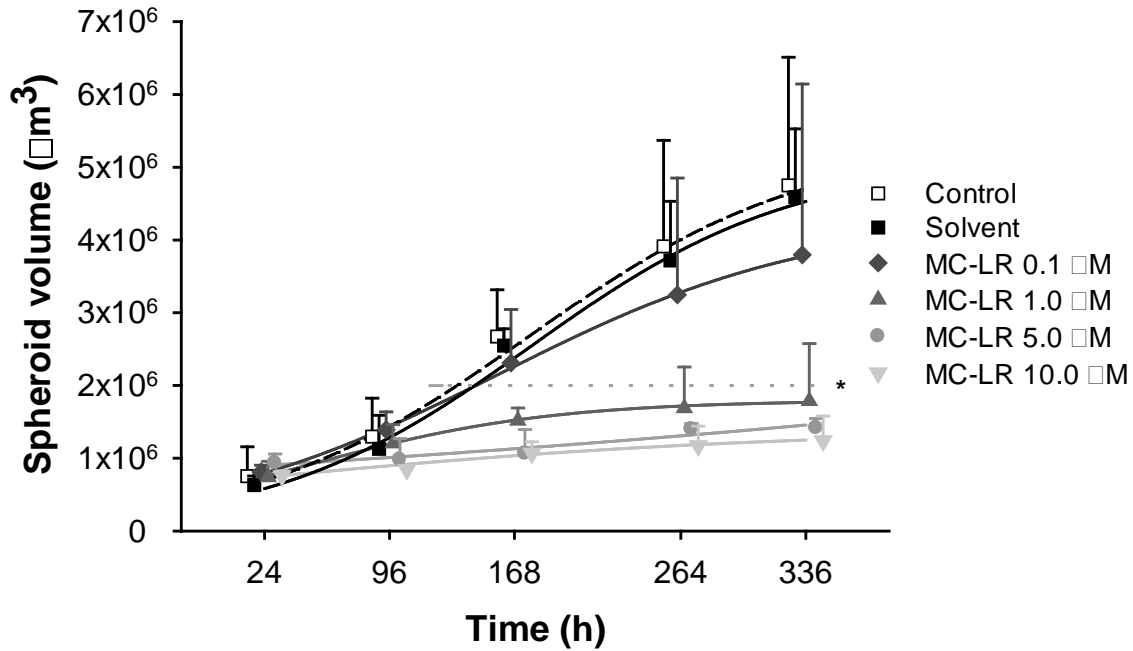

B)

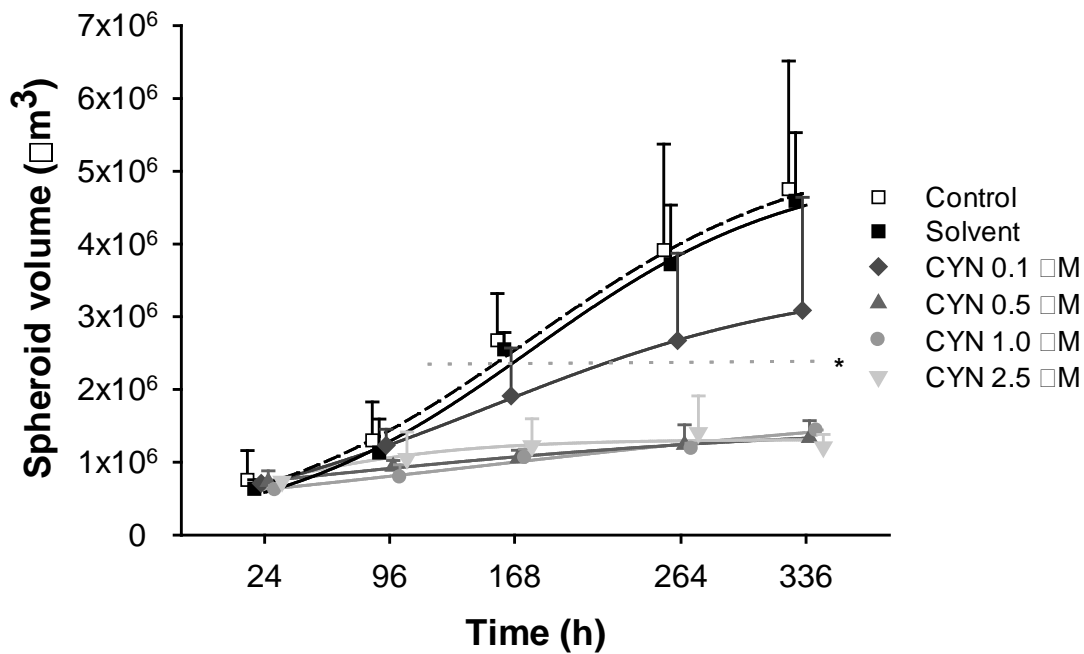

**Supporting Figure S4. Effects of microcystin-LR (MC-LR) and cylindrospermopsin (CYN) on the growth of small growing spheroids of adult human liver stem cells.** HL1-hT1 cells were seeded into micromolded agarose gel at the initial density 250 cell/spheroid, immediately treated by (A) MC-LR or (B) CYN, and exposed for 336 h. Spheroids were documented periodically by brightfield microscopy (8X magnification) and their size was expressed as spheroid volume. Control - nontreated control, Solvent - solvent control (0.2% MeOH, v/v). Data represent average $\pm$ SD values derived from independently repeated experiments, the curves in graphs depict a fit of 3-parameter sigmoid function. \*Data points below the dashed line were significantly lower (Mann-Whitney test,  $p < 0.05$ ) than the solvent control.

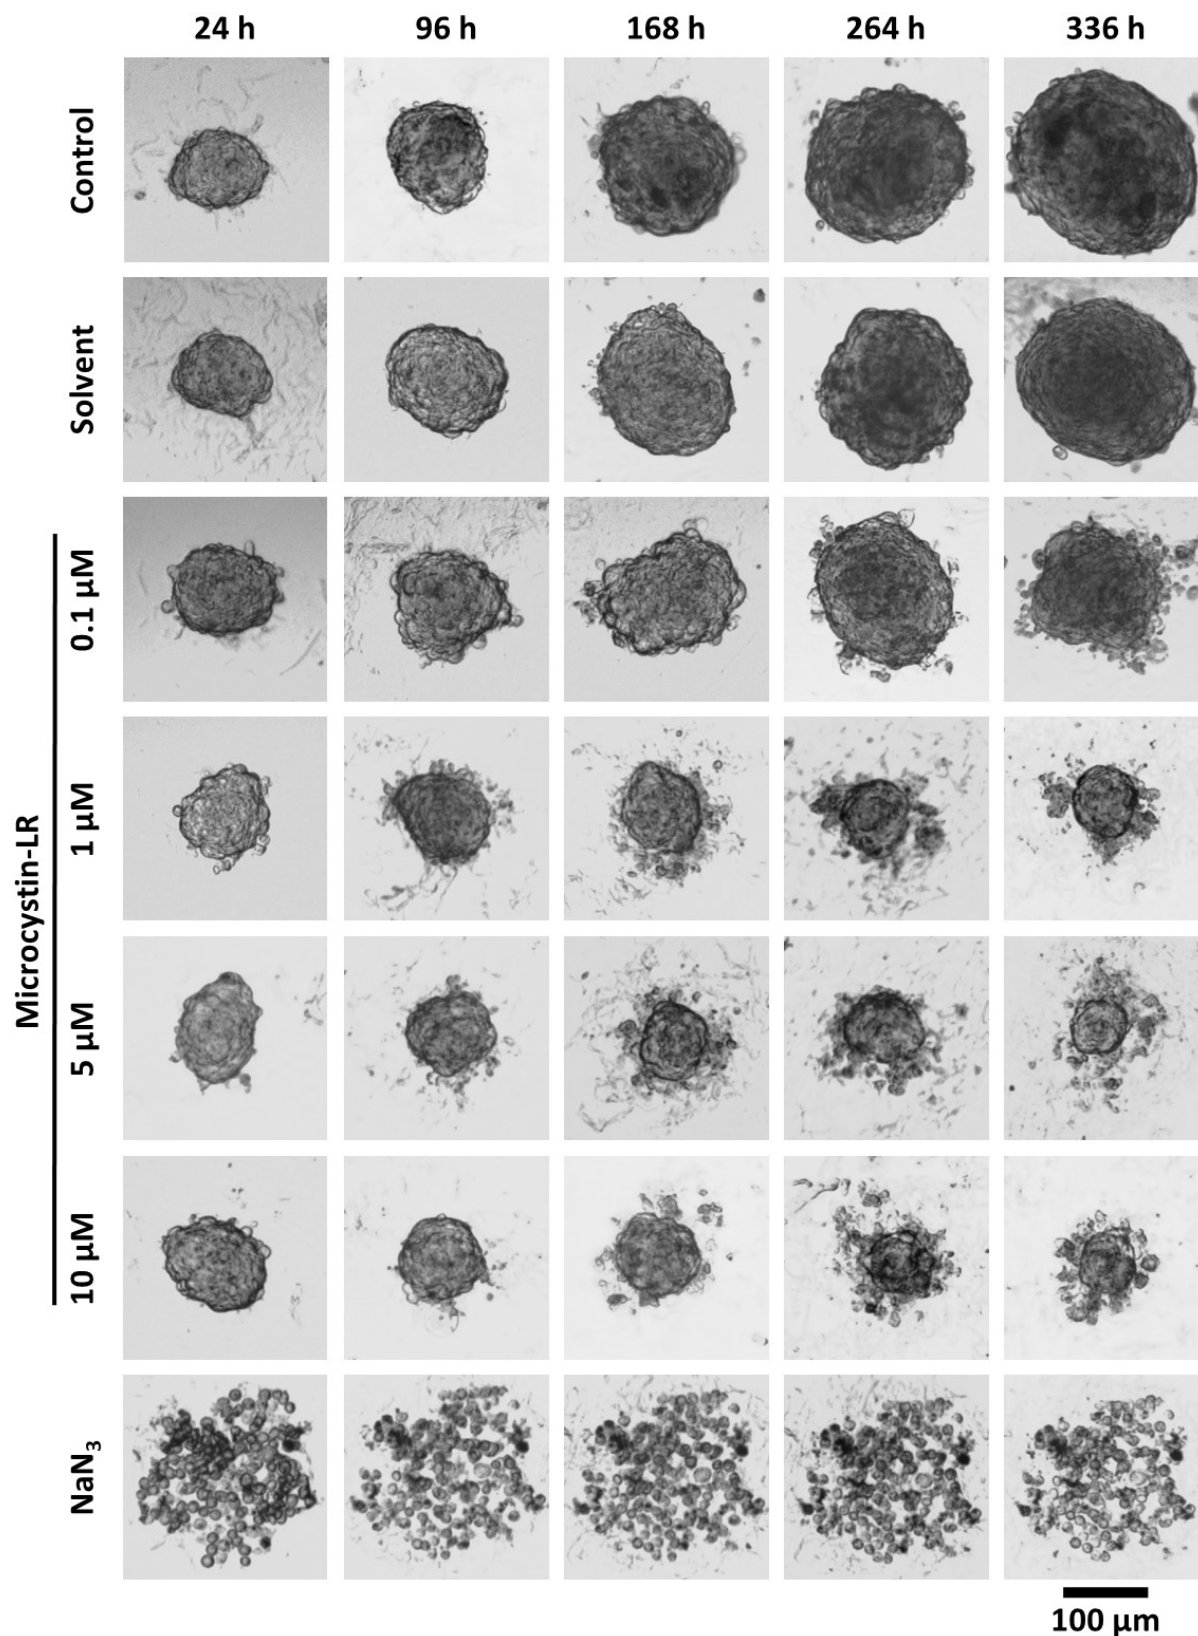

**Supporting Figure S5. Effects of microcystin-LR (MC-LR) on the formation and growth of small growing spheroids of adult human liver stem cells.** HL1-hT1 cells were seeded into micromolded agarose gel at the initial density 250 cell/spheroid, immediately treated by cyanotoxins MC-LR and exposed for 336 h. Spheroids were documented periodically by brightfield microscopy (8X magnification) and representative spheroid images are shown. Control - nontreated control, Solvent - solvent control (0.2% MeOH, v/v),  $\text{NaN}_3$  - positive control (1% sodium azide, w/v).

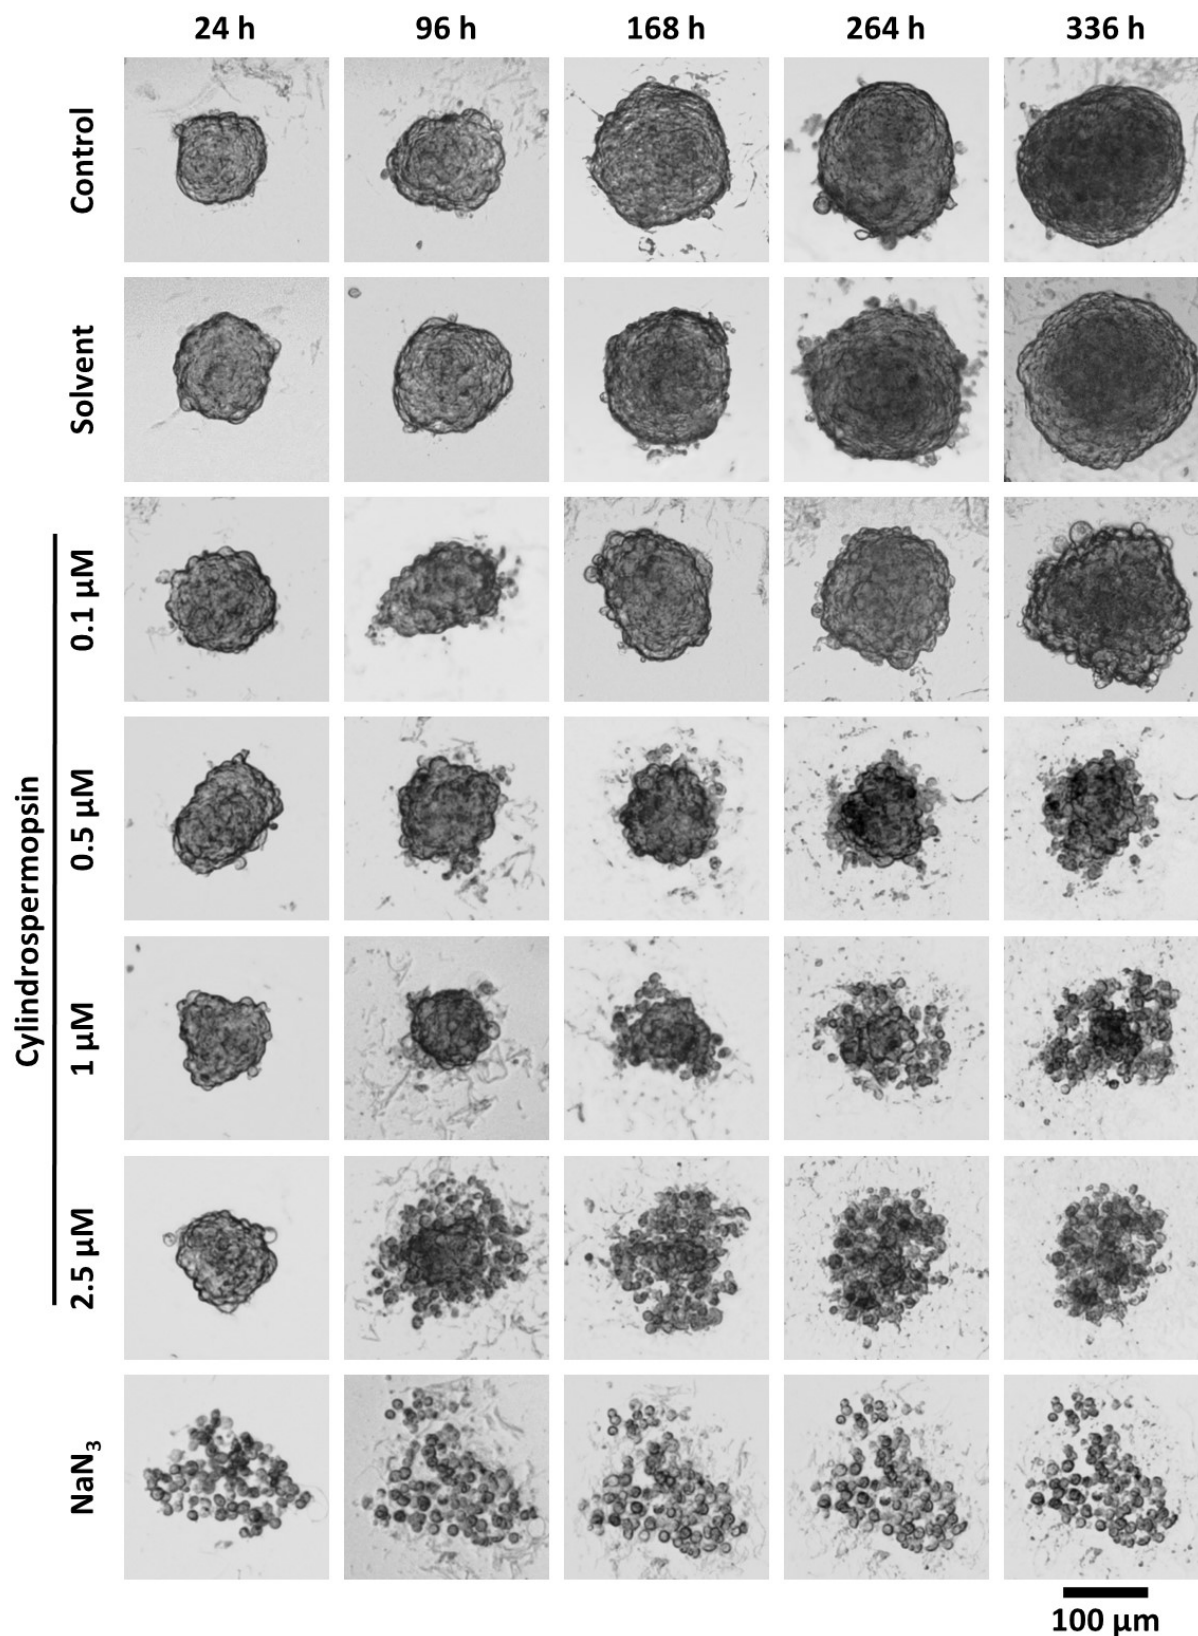

**Supporting Figure S6. Effects of cylindrospermopsin (CYN) on the formation and growth of small growing spheroids of adult human liver stem cells.** HL1-hT1 cells were seeded into micromolded agarose gel at the initial density 250 cell/spheroid, immediately treated by cyanotoxins CYN and exposed for 336 h. Spheroids were documented periodically by brightfield microscopy (8X magnification) and representative spheroid images are shown. Control - nontreated control, Solvent - solvent control (0.2% MeOH, v/v),  $\text{NaN}_3$  - positive control (1% sodium azide, w/v).

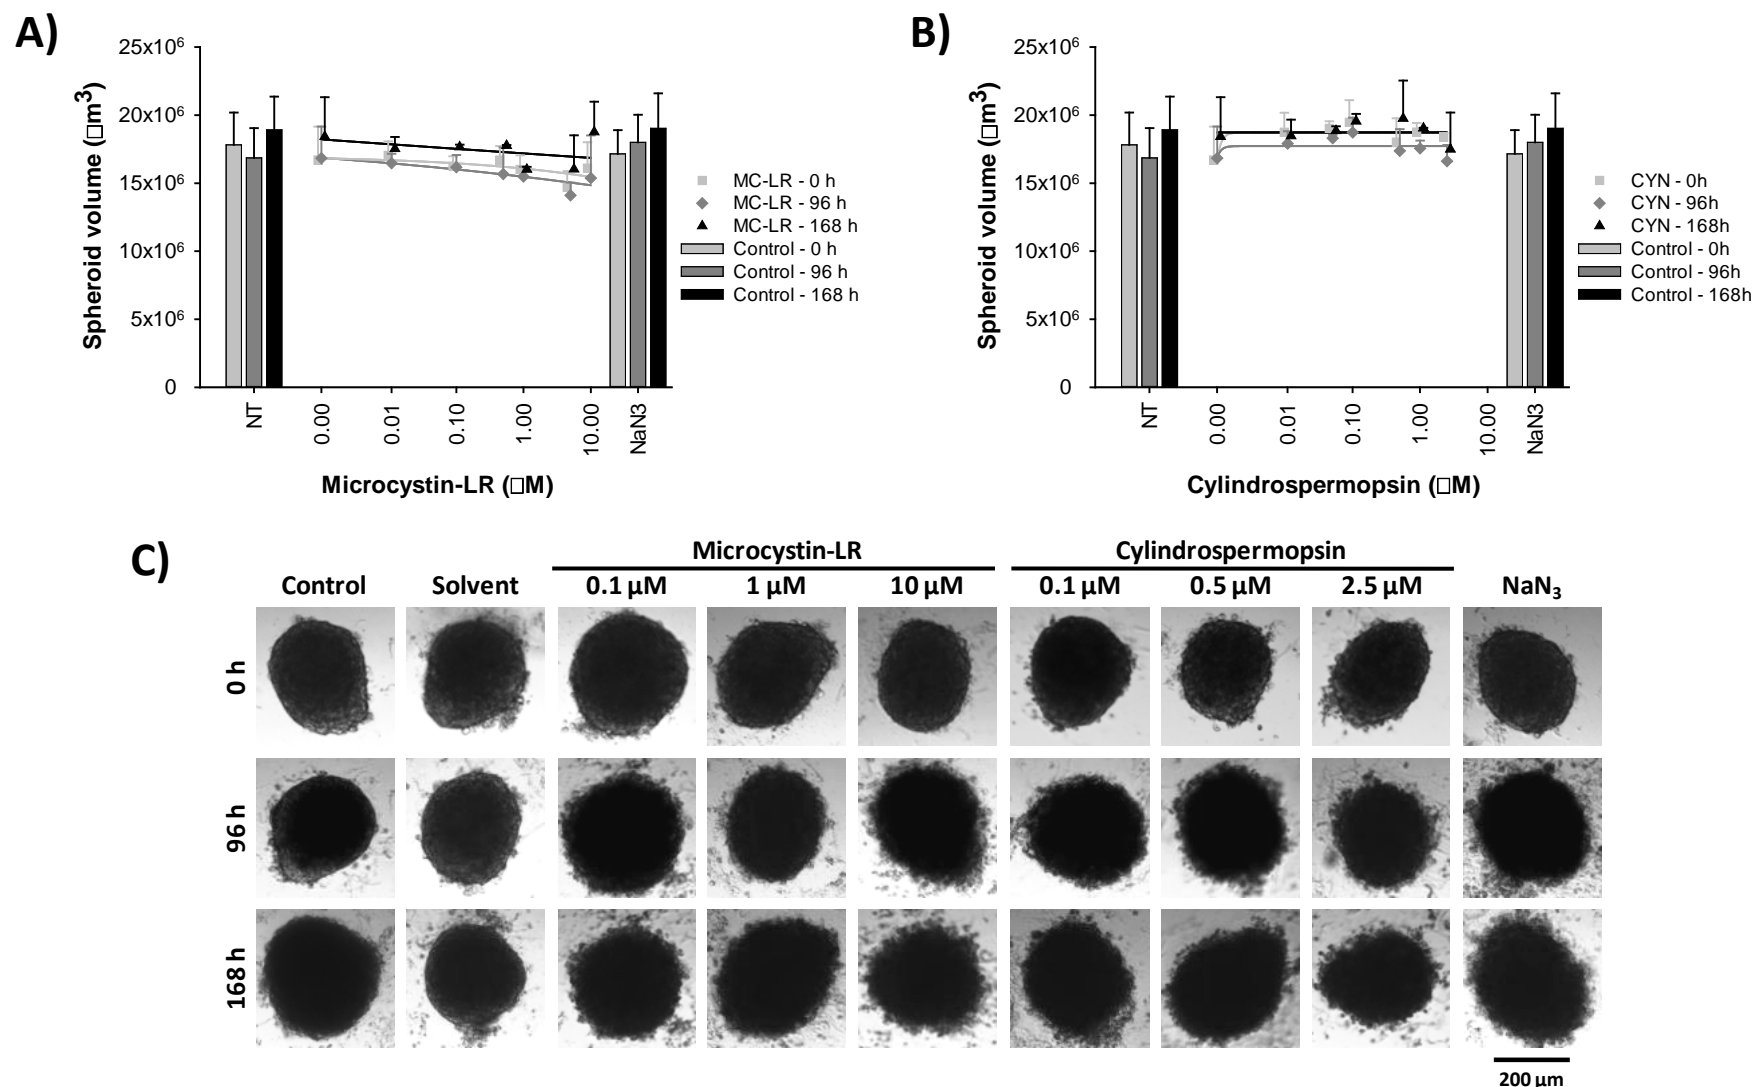

**Supporting Figure S7. Effects of microcystin-LR (MC-LR) and cylindrospermopsin (CYN) on the size and morphology of large mature spheroids of adult human liver stem cells.** HL1-hT1 cells were seeded into micromolded agarose gels at the initial density 4000 cell/spheroid. Spheroids were incubated for 168 h and then treated with MC-LR or CYN. Spheroids were documented periodically by brightfield microscopy (8X magnification) and their size was expressed as a spheroid volume (A, B). Representative spheroid images (C) are shown for 0 h, 96 h and 168 h of exposure. NT - nontreated control (Control), Solvent - solvent control (0.2% MeOH, v/v), NaN<sub>3</sub> - positive control (1% sodium azide, w/v). Data represent average $\pm$ SD values derived from independently repeated experiments, the curves in the graphs depict a fit of 3-parameter sigmoid function. Data points below the dashed line were significantly lower (Mann-Whitney test,  $p < 0.05$ ) than the solvent control.

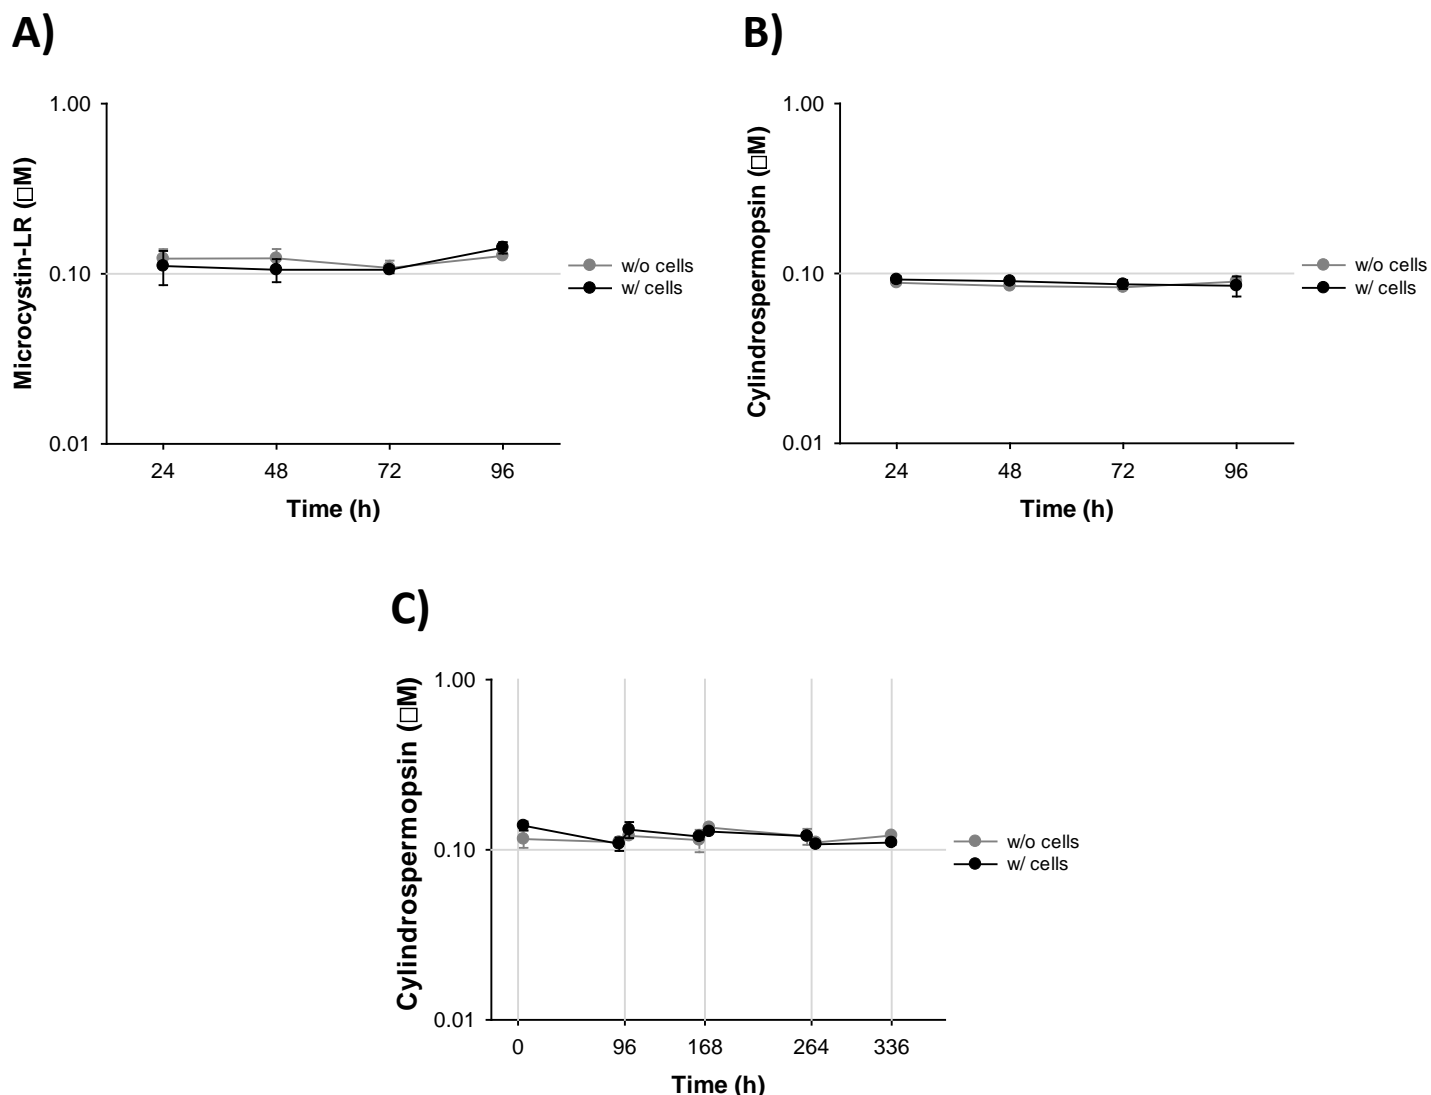

**Supporting Figure S8. Analysis of microcystin-LR (MC-LR) and cylindrospermopsin (CYN) concentration in the cell culture medium in monolayer and spheroid experiments.** In the monolayer experiments, (A) MC-LR or (B) CYN were added into the culture of HL1-hT1 cells at the nominal concentration 0.1 μM, and their concentrations were determined after 24-96 h of exposure. (C) In the spheroid experiments, CYN was added to the cultures of mature spheroids (4000 cell/spheroid) at the initial concentration 0.15 μM in order to reach nominal concentration 0.1 μM after equilibration with the agarose gel. Cyanotoxin concentrations were determined 1 h after the cyanotoxin addition or medium exchange (t=1 h, 97 h, 169 h, 265 h), and prior the medium exchange or experiment termination (t=96 h, 168 h, 264 h, 336 h). Black lines represent cyanotoxin concentrations in the experimental wells with the cells (w/ cells), gray lines represent the control wells without the cells (w/o cells). Exposure start/end and medium exchanges in the spheroid experiments are indicated by the vertical lines, the nominal concentrations of cyanotoxins are indicated by the horizontal lines. Data represent average±SD from independent experiments.

**Supporting Table S1. Summary of microcystin-LR (MC-LR) and cylindrospermopsin (CYN) effects on HL1-hT1 cells in monolayer and spheroid experiments – NOEC, LOEC, EC<sub>25</sub> and EC<sub>50</sub> values<sup>a</sup>**

| Cyano-toxin | Exposure Time (h) | Monolayer cultures <sup>b</sup>             |           |                       |                       |             |           |                       |                       |                                             |           |                       |                       |             |           |                       |                       |
|-------------|-------------------|---------------------------------------------|-----------|-----------------------|-----------------------|-------------|-----------|-----------------------|-----------------------|---------------------------------------------|-----------|-----------------------|-----------------------|-------------|-----------|-----------------------|-----------------------|
|             |                   | NRU                                         |           |                       |                       | Alamar Blue |           |                       |                       | CFDA-AM                                     |           |                       |                       | %DCI        |           |                       |                       |
|             |                   | NOEC (nM)                                   | LOEC (nM) | EC <sub>25</sub> (nM) | EC <sub>50</sub> (nM) | NOEC (nM)   | LOEC (nM) | EC <sub>25</sub> (nM) | EC <sub>50</sub> (nM) | NOEC (nM)                                   | LOEC (nM) | EC <sub>25</sub> (nM) | EC <sub>50</sub> (nM) | NOEC (nM)   | LOEC (nM) | EC <sub>25</sub> (nM) | EC <sub>50</sub> (nM) |
| MC-LR       | 48                | >10,000                                     | >10,000   | >10,000               | >10,000               | >10,000     | >10,000   | >10,000               | >10,000               | >10,000                                     | >10,000   | >10,000               | >10,000               | >10,000     | >10,000   | >10,000               | >10,000               |
|             | 72                | n.a. <sup>d</sup>                           | n.a.      | n.a.                  | n.a.                  | n.a.        | n.a.      | n.a.                  | n.a.                  | n.a.                                        | n.a.      | n.a.                  | n.a.                  | >10,000     | >10,000   | >10,000               | >10,000               |
|             | 96                | >10,000                                     | >10,000   | >10,000               | >10,000               | >10,000     | >10,000   | >10,000               | >10,000               | >10,000                                     | >10,000   | >10,000               | >10,000               | >10,000     | >10,000   | >10,000               | >10,000               |
|             | 120               | n.a.                                        | n.a.      | n.a.                  | n.a.                  | n.a.        | n.a.      | n.a.                  | n.a.                  | n.a.                                        | n.a.      | n.a.                  | n.a.                  | >10,000     | >10,000   | >10,000               | >10,000               |
| CYN         | 48                | 100                                         | 500       | 256                   | 726                   | 100         | 500       | 381                   | 1,317                 | 1,000                                       | 2,500     | 2,855                 | 5,506                 | 1,000       | 2,500     | 880                   | 1,548                 |
|             | 72                | n.a.                                        | n.a.      | n.a.                  | n.a.                  | n.a.        | n.a.      | n.a.                  | n.a.                  | n.a.                                        | n.a.      | n.a.                  | n.a.                  | 500         | 1,000     | 538                   | 852                   |
|             | 96                | 100                                         | 500       | 370                   | 753                   | 100         | 500       | 261                   | 614                   | 1,000                                       | 2,500     | 2,239                 | 2,910                 | 100         | 500       | 401                   | 616                   |
|             | 120               | n.a.                                        | n.a.      | n.a.                  | n.a.                  | n.a.        | n.a.      | n.a.                  | n.a.                  | n.a.                                        | n.a.      | n.a.                  | n.a.                  | 100         | 500       | 265                   | 454                   |
| Cyano-toxin | Exposure Time (h) | Spheroid cultures <sup>c</sup>              |           |                       |                       |             |           |                       |                       |                                             |           |                       |                       |             |           |                       |                       |
|             |                   | Small growing spheroids (250 cell/spheroid) |           |                       |                       |             |           |                       |                       | Large mature spheroids (4000 cell/spheroid) |           |                       |                       |             |           |                       |                       |
|             |                   | Relative Spheroid Growth                    |           |                       |                       | Alamar Blue |           |                       |                       | Relative Spheroid Growth                    |           |                       |                       | Alamar Blue |           |                       |                       |
|             |                   | NOEC (nM)                                   | LOEC (nM) | EC <sub>25</sub> (nM) | EC <sub>50</sub> (nM) | NOEC (nM)   | LOEC (nM) | EC <sub>25</sub> (nM) | EC <sub>50</sub> (nM) | NOEC (nM)                                   | LOEC (nM) | EC <sub>25</sub> (nM) | EC <sub>50</sub> (nM) | NOEC (nM)   | LOEC (nM) | EC <sub>25</sub> (nM) | EC <sub>50</sub> (nM) |
| MC-LR       | 96                | 1,000                                       | 5,000     | 888                   | 2,145                 | n.a.        | n.a.      | n.a.                  | n.a.                  | >10,000                                     | >10,000   | >10,000               | >10,000               | <10         | 10        | 11                    | 43                    |
|             | 168               | <100                                        | 100       | 68                    | 390                   | n.a.        | n.a.      | n.a.                  | n.a.                  | >10,000                                     | >10,000   | >10,000               | >10,000               | <10         | 10        | 6                     | 79                    |
|             | 264               | <100                                        | 100       | 33                    | 202                   | n.a.        | n.a.      | n.a.                  | n.a.                  | n.a.                                        | n.a.      | n.a.                  | n.a.                  | n.a.        | n.a.      | n.a.                  | n.a.                  |
|             | 336               | <100                                        | 100       | 29                    | 162                   | <100        | 100       | 47                    | 146                   | n.a.                                        | n.a.      | n.a.                  | n.a.                  | n.a.        | n.a.      | n.a.                  | n.a.                  |
| CYN         | 96                | 100                                         | 500       | 153                   | 377                   | n.a.        | n.a.      | n.a.                  | n.a.                  | >2,500                                      | >2,500    | >2,500                | >2,500                | <10         | 10        | 3                     | 104                   |
|             | 168               | <100                                        | 100       | 28                    | 145                   | n.a.        | n.a.      | n.a.                  | n.a.                  | >2,500                                      | >2,500    | >2,500                | >2,500                | <10         | 10        | 7                     | 54                    |
|             | 264               | <100                                        | 100       | 33                    | 145                   | n.a.        | n.a.      | n.a.                  | n.a.                  | n.a.                                        | n.a.      | n.a.                  | n.a.                  | n.a.        | n.a.      | n.a.                  | n.a.                  |
|             | 336               | <100                                        | 100       | 36                    | 124                   | <100        | 100       | 23                    | 119                   | n.a.                                        | n.a.      | n.a.                  | n.a.                  | n.a.        | n.a.      | n.a.                  | n.a.                  |

<sup>a</sup> EC<sub>25</sub> / EC<sub>50</sub> (effective concentrations inducing 25% or 50% inhibition of growth or viability) values were estimated using a 3-parameter sigmoid function; NOEC (No Observed Effect Concentration) / LOEC (Lowest Observed Effect Concentration) values were assessed by Mann-Whitney test (p<0.05)

<sup>b</sup> In monolayer experiments, cell growth and viability were evaluated using Neutral Red Uptake (NRU), Alamar Blue, and CFDA-AM assays as well as using impedimetric analysis (%DCI – control-normalized Delta Cell Index)

<sup>c</sup> In spheroid experiments, the values were calculated from control-normalized spheroid growth (Relative Spheroid Growth) and from viability assay (Alamar Blue).

<sup>d</sup> n.a. – not available, the condition was not tested
